# Supplementary material for: Metabolic Syndrome and Adipokines Profile in Bipolar Depression
Source: MDPI journal article supplement (doi:10.3390/nu15214532), 2023-10-25
Supplement: s1 [file s1]

**Table S1.** List of psychiatric medications (active substances) patients take during six weeks of study.

| Drugs                   |                   | Women<br>N (%) | Men<br>N (%) |
|-------------------------|-------------------|----------------|--------------|
| <b>Antidepressants</b>  |                   |                |              |
| SSRI                    | Citalpram         | 1 (2)          | 0 (0)        |
|                         | Escitalopram      | 3 (6)          | 0 (0)        |
|                         | Fluoxetine        | 3 (6)          | 0 (0)        |
|                         | Fluvoxamine       | 1 (2)          | 0 (0)        |
|                         | Paroxetine        | 4 (8)          | 0 (0)        |
|                         | Sertaline         | 7 (14)         | 2 (10)       |
| SNRI                    | Venlafaxine       | 21 (42)        | 7 (35)       |
| NaSSA                   | Mirtazapine       | 9 (18)         | 5 (25)       |
|                         | Mianserin         | 1 (2)          | 0 (0)        |
| SARI                    | Trazodone         | 4 (8)          | 0 (0)        |
| TCA                     | Amitriptyline     | 1 (2)          | 0 (0)        |
|                         | Clomipramine      | 2 (4)          | 0 (0)        |
| NRI                     | Reboxetine        | 4 (8)          | 0 (0)        |
| NDRI                    | Bupropion         | 2 (4)          | 1 (5)        |
| <b>Mood stabilizers</b> |                   |                |              |
|                         | Carbamazepine     | 2 (4)          | 3 (15)       |
|                         | Valproic acid     | 9 (18)         | 11 (55)      |
|                         | Lamotrigine       | 9 (18)         | 1 (5)        |
|                         | Lithium carbonate | 23 (46)        | 10 (50)      |
| <b>Antipsychotics</b>   |                   |                |              |
|                         | Aripirazole       | 4 (8)          | 0 (0)        |
|                         | Clozapine         | 12 (24)        | 3 (15)       |
|                         | Quetiapine        | 32 (64)        | 8 (40)       |
|                         | Levomepromazine   | 0 (0)          | 1 (5)        |
|                         | Olanzapine        | 13 (26)        | 5 (25)       |
|                         | Risperidone       | 0 (0)          | 2 (10)       |
|                         | Zuclopenthixol    | 3 (6)          | 2 (10)       |

Abbreviations: SSRI - selective serotonin reuptake inhibitor, SNRI – serotonin-norepinephrine reuptake inhibitor, NaSSA - noradrenergic and specific serotonergic antidepressants, SARI- serotonin antagonist and reuptake inhibitors, TCA - tricyclic antidepressants, NRI - noradrenaline reuptake inhibitors, NDRI - norepinephrine–dopamine reuptake inhibitor

**Table S2.** The ROC curve analysis of ADIPO/LEP ratio for metabolic syndrome in bipolar depressed women group.

| Ratio | MS | W | SV    | SP    | ACC   | PPV   | NPV   | LR+   | LR-   | YI    |
|-------|----|---|-------|-------|-------|-------|-------|-------|-------|-------|
| 0.029 | 1  | 0 | 0.029 | 1.000 | 0.340 | 1.000 | 0.327 |       | 0.971 | 0.029 |
| 0.040 | 1  | 0 | 0.059 | 1.000 | 0.360 | 1.000 | 0.333 |       | 0.941 | 0.059 |
| 0.046 | 1  | 0 | 0.088 | 1.000 | 0.380 | 1.000 | 0.340 |       | 0.912 | 0.088 |
| 0.052 | 1  | 0 | 0.118 | 1.000 | 0.400 | 1.000 | 0.348 |       | 0.882 | 0.118 |
| 0.060 | 1  | 0 | 0.147 | 1.000 | 0.420 | 1.000 | 0.359 |       | 0.853 | 0.147 |
| 0.070 | 1  | 0 | 0.176 | 1.000 | 0.440 | 1.000 | 0.364 |       | 0.824 | 0.176 |
| 0.071 | 1  | 0 | 0.206 | 1.000 | 0.460 | 1.000 | 0.372 |       | 0.794 | 0.206 |
| 0.076 | 1  | 0 | 0.235 | 1.000 | 0.480 | 1.000 | 0.381 |       | 0.765 | 0.235 |
| 0.089 | 0  | 1 | 0.235 | 0.938 | 0.460 | 0.889 | 0.366 | 3.765 | 0.816 | 0.173 |
| 0.091 | 1  | 0 | 0.265 | 0.938 | 0.480 | 0.900 | 0.375 | 4.235 | 0.784 | 0.202 |

|       |   |   |       |       |       |       |       |       |       |        |
|-------|---|---|-------|-------|-------|-------|-------|-------|-------|--------|
| 0.099 | 1 | 0 | 0.294 | 0.938 | 0.500 | 0.909 | 0.385 | 4.706 | 0.753 | 0.232  |
| 0.124 | 1 | 0 | 0.324 | 0.938 | 0.520 | 0.917 | 0.395 | 5.176 | 0.722 | 0.261  |
| 0.129 | 1 | 0 | 0.353 | 0.938 | 0.540 | 0.923 | 0.405 | 5.647 | 0.690 | 0.290  |
| 0.136 | 1 | 0 | 0.382 | 0.938 | 0.560 | 0.929 | 0.417 | 6.118 | 0.659 | 0.320  |
| 0.138 | 1 | 0 | 0.412 | 0.938 | 0.580 | 0.933 | 0.429 | 6.588 | 0.627 | 0.349  |
| 0.145 | 1 | 0 | 0.441 | 0.938 | 0.600 | 0.938 | 0.441 | 7.059 | 0.596 | 0.379  |
| 0.172 | 1 | 0 | 0.471 | 0.938 | 0.620 | 0.941 | 0.455 | 7.529 | 0.565 | 0.408  |
| 0.189 | 0 | 1 | 0.471 | 0.875 | 0.600 | 0.889 | 0.438 | 3.765 | 0.605 | 0.346  |
| 0.200 | 1 | 0 | 0.500 | 0.875 | 0.620 | 0.895 | 0.452 | 4.000 | 0.571 | 0.375  |
| 0.209 | 1 | 0 | 0.529 | 0.875 | 0.640 | 0.900 | 0.467 | 4.235 | 0.538 | 0.404  |
| 0.223 | 1 | 0 | 0.559 | 0.875 | 0.660 | 0.905 | 0.483 | 4.471 | 0.504 | 0.434  |
| 0.236 | 1 | 0 | 0.588 | 0.875 | 0.680 | 0.909 | 0.500 | 4.706 | 0.471 | 0.463  |
| 0.246 | 1 | 0 | 0.618 | 0.875 | 0.700 | 0.913 | 0.519 | 4.941 | 0.437 | 0.493  |
| 0.248 | 1 | 0 | 0.647 | 0.875 | 0.720 | 0.917 | 0.538 | 5.176 | 0.403 | 0.522  |
| 0.259 | 1 | 0 | 0.706 | 0.875 | 0.760 | 0.923 | 0.583 | 5.647 | 0.336 | 0.581  |
| 0.259 | 1 | 0 | 0.706 | 0.875 | 0.760 | 0.923 | 0.583 | 5.647 | 0.336 | 0.581  |
| 0.281 | 1 | 0 | 0.735 | 0.875 | 0.780 | 0.926 | 0.609 | 5.882 | 0.303 | 0.610  |
| 0.310 | 1 | 0 | 0.765 | 0.875 | 0.800 | 0.929 | 0.636 | 6.118 | 0.269 | 0.640  |
| 0.314 | 0 | 1 | 0.765 | 0.813 | 0.780 | 0.897 | 0.619 | 4.078 | 0.290 | 0.577  |
| 0.323 | 1 | 0 | 0.794 | 0.813 | 0.800 | 0.900 | 0.650 | 4.235 | 0.253 | 0.607  |
| 0.338 | 0 | 1 | 0.794 | 0.750 | 0.780 | 0.871 | 0.632 | 3.176 | 0.275 | 0.544  |
| 0.343 | 1 | 0 | 0.824 | 0.750 | 0.800 | 0.875 | 0.667 | 3.294 | 0.235 | 0.574  |
| 0.358 | 1 | 0 | 0.853 | 0.750 | 0.820 | 0.879 | 0.706 | 3.412 | 0.196 | 0.603  |
| 0.380 | 1 | 0 | 0.882 | 0.750 | 0.840 | 0.882 | 0.750 | 3.529 | 0.157 | 0.632  |
| 0.415 | 0 | 1 | 0.882 | 0.688 | 0.820 | 0.857 | 0.733 | 2.824 | 0.171 | 0.570  |
| 0.484 | 1 | 0 | 0.912 | 0.688 | 0.840 | 0.861 | 0.786 | 2.918 | 0.128 | 0.599  |
| 0.551 | 0 | 1 | 0.912 | 0.625 | 0.820 | 0.838 | 0.769 | 2.431 | 0.141 | 0.537  |
| 0.564 | 0 | 1 | 0.912 | 0.563 | 0.800 | 0.816 | 0.750 | 2.084 | 0.157 | 0.474  |
| 0.695 | 1 | 0 | 0.941 | 0.563 | 0.820 | 0.821 | 0.818 | 2.151 | 0.105 | 0.504  |
| 0.750 | 0 | 1 | 0.941 | 0.500 | 0.800 | 0.800 | 0.800 | 1.882 | 0.118 | 0.441  |
| 0.804 | 0 | 1 | 0.941 | 0.438 | 0.780 | 0.780 | 0.778 | 1.673 | 0.134 | 0.379  |
| 0.964 | 0 | 1 | 0.941 | 0.375 | 0.760 | 0.762 | 0.750 | 1.506 | 0.157 | 0.316  |
| 1.289 | 0 | 1 | 0.941 | 0.313 | 0.740 | 0.744 | 0.714 | 1.369 | 0.188 | 0.254  |
| 1.515 | 0 | 1 | 0.941 | 0.250 | 0.720 | 0.727 | 0.667 | 1.255 | 0.235 | 0.191  |
| 1.776 | 0 | 1 | 0.941 | 0.188 | 0.700 | 0.711 | 0.600 | 1.158 | 0.314 | 0.129  |
| 1.857 | 1 | 0 | 0.971 | 0.188 | 0.720 | 0.717 | 0.750 | 1.195 | 0.157 | 0.158  |
| 2.114 | 0 | 1 | 0.971 | 0.125 | 0.700 | 0.702 | 0.667 | 1.109 | 0.235 | 0.096  |
| 2.876 | 0 | 1 | 0.971 | 0.063 | 0.680 | 0.688 | 0.500 | 1.035 | 0.471 | 0.033  |
| 3.173 | 0 | 1 | 0.971 | 0.000 | 0.660 | 0.673 | 0.000 | 0.971 |       | -0.029 |
| 4.286 | 1 | 0 | 1.000 | 0.000 | 0.680 | 0.680 |       | 1.000 |       | 0.000  |

Abbreviations: Ratio – adiponectin/leptin ratio, MS – patients with metabolic syndrome (1), W – patients without metabolic syndrome (1), SV – sensitivity, SP – specificity, ACC – accuracy, PPV – positive predictive value, NPV – negative predictive value, LR+ – positive likelihood ratio, LR – negative likelihood ratio, YI – Youden index.
